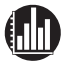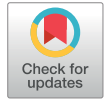

# No Acute Effects of Exogenous Glucose-Dependent Insulinotropic Polypeptide on Energy Intake, Appetite, or Energy Expenditure When Added to Treatment With a Long-Acting Glucagon-Like Peptide 1 Receptor Agonist in Men With Type 2 Diabetes

*Diabetes Care* 2020;43:588–596 | <https://doi.org/10.2337/dc19-0578>

Natasha C. Bergmann,<sup>1,2,3</sup>  
Lærke S. Gasbjerg,<sup>1,3</sup>  
Sebastian M. Heimbürger,<sup>1,4</sup>  
Liva S.L. Krogh,<sup>1</sup> Flemming Dela,<sup>5,6</sup>  
Bolette Hartmann,<sup>3,4</sup> Jens J. Holst,<sup>3,4</sup>  
Lene Jessen,<sup>2</sup> Mikkel B. Christensen,<sup>1,7,8</sup>  
Tina Vilsbøll,<sup>1,7,9</sup> Asger Lund,<sup>1</sup> and  
Filip K. Knop<sup>1,4,7,9</sup>

## OBJECTIVE

Dual incretin receptor agonists in clinical development have shown reductions in body weight and hemoglobin A<sub>1c</sub> (HbA<sub>1c</sub>) in patients with type 2 diabetes, but the impact of glucose-dependent insulinotropic polypeptide (GIP) receptor activation remains unclear. Here, we evaluated the effects of high-dose exogenous GIP on energy intake, energy expenditure, plasma glucose, and glucose-regulating hormones in patients with type 2 diabetes treated with a long-acting glucagon-like peptide 1 receptor (GLP-1R) agonist.

## RESEARCH DESIGN AND METHODS

In a randomized, double-blind design, men with type 2 diabetes ( $n = 22$ , mean  $\pm$  SEM HbA<sub>1c</sub>  $6.8 \pm 0.1\%$  [ $51 \pm 1.5$  mmol/mol]) treated with metformin and long-acting GLP-1R agonists were subjected to two 5-h continuous infusions (separated by a washout period of  $\geq 3$  days): one with GIP (6 pmol/kg/min) and another with saline (placebo). After 60 min of infusion, a liquid mixed-meal test was performed, and after 270 min of infusion, an ad libitum meal was served for evaluation of energy intake (primary end point).

## RESULTS

Energy intake was similar during GIP and placebo infusion ( $648 \pm 74$  kcal vs.  $594 \pm 55$  kcal, respectively;  $P = 0.480$ ), as were appetite measures and energy expenditure. Plasma glucagon and glucose were higher during GIP infusion compared with placebo infusion ( $P = 0.026$  and  $P = 0.017$ ) as assessed by area under the curve.

## CONCLUSIONS

In patients with type 2 diabetes, GIP infusion on top of treatment with metformin and a long-acting GLP-1R agonist did not affect energy intake, appetite, or energy expenditure but increased plasma glucose compared with placebo. These results indicate no acute beneficial effects of combining GIP and GLP-1.

<sup>1</sup>Center for Clinical Metabolic Research, Gentofte Hospital, University of Copenhagen, Hellerup, Denmark

<sup>2</sup>Zealand Pharma A/S, Glostrup, Denmark

<sup>3</sup>Department of Biomedical Sciences, Faculty of Health and Medical Sciences, University of Copenhagen, Copenhagen, Denmark

<sup>4</sup>Novo Nordisk Foundation Center for Basic Metabolic Research, Faculty of Health and Medical Sciences, University of Copenhagen, Copenhagen, Denmark

<sup>5</sup>Xlab, Center for Healthy Ageing, Department of Biomedical Sciences, Faculty of Health and Medical Sciences, University of Copenhagen, Copenhagen, Denmark

<sup>6</sup>Department of Geriatrics, Bispebjerg Hospital, University of Copenhagen, Copenhagen, Denmark

<sup>7</sup>Department of Clinical Medicine, Faculty of Health and Medical Sciences, University of Copenhagen, Copenhagen, Denmark

<sup>8</sup>Department of Clinical Pharmacology, Bispebjerg Hospital, University of Copenhagen, Copenhagen, Denmark

<sup>9</sup>Steno Diabetes Center Copenhagen, Gentofte, Denmark

Corresponding author: Filip K. Knop, [filip.krag.knop.01@regionh.dk](mailto:filip.krag.knop.01@regionh.dk)

Received 21 March 2019 and accepted 18 December 2019

Clinical trial reg. no. NCT03526289, [clinicaltrials.gov](https://clinicaltrials.gov)

This article contains Supplementary Data online at <https://care.diabetesjournals.org/lookup/suppl/doi:10.2337/dc19-0578/-/DC1>.

© 2020 by the American Diabetes Association. Readers may use this article as long as the work is properly cited, the use is educational and not for profit, and the work is not altered. More information is available at <https://www.diabetesjournals.org/content/license>.

Glucose-dependent insulinotropic polypeptide (GIP) and glucagon-like peptide 1 (GLP-1) are the two known incretin hormones in man (1). In healthy individuals, the two hormones have additive insulinotropic effects and account for 40–70% of the total insulin secretion following an oral glucose tolerance test (1–3). GLP-1 furthermore acts as a satiety-promoting hormone (4), and GLP-1 receptor (GLP-1R) agonists with plasma glucose-lowering and body weight-reducing effects have been developed for the treatment of type 2 diabetes and obesity. In contrast, no GIP receptor (GIPR) agonists are currently available (5). The main obstacle for the utilization of GIPR agonism as a treatment of type 2 diabetes is the diminished insulinotropic effect of GIP observed in patients with type 2 diabetes (6,7), which seems to be driven by the hyperglycemic state (8) and thus appears partly restorable when hyperglycemia is corrected (9,10). Another obstacle is the uncertainty as to whether GIP is an obesity-promoting hormone (5). Hence, diet-induced body weight gain in mice has been prevented both by elimination of GIPR activation as well as by GIP overexpression (11–15). In patients with type 2 diabetes, acute coadministration of GIP and GLP-1 does not induce an additional glucose-lowering effect compared with GLP-1 alone (16–19). Also, GIP infusion does not result in a reduction in energy intake or increase in energy expenditure, which would indicate a later body weight loss (19,20). Nevertheless, a dual GIPR/GLP-1R agonist in clinical development (LY3298176 [tirzepatide]) was recently reported to lower body weight as well as to improve glycemic control compared with GLP-1R agonism alone in patients with type 2 diabetes (21). These results support earlier findings of improved glycemic control in patients with type 2 diabetes treated with dual GIPR/GLP-1R agonist in clinical trials (22,23). Furthermore, the results are in line with an increasing number of rodent studies reporting additive body weight- and plasma glucose-lowering effects of combined GIPR and GLP-1R activation compared with GLP-1R activation alone (22,24,25). Thus, a renewed interest in GIPR agonism as a potentially effective add-on to GLP-1R agonism in type 2 diabetes has been introduced, but the contribution of GIPR activation to the results obtained with the GIPR/GLP-1R dual agonists remains uncertain in humans (5,26). It has been hypothesized that the complementary benefits of dual GIPR/

GLP-1R agonism compared with GLP-1R agonism alone might be mediated by an alleviation of GIP resistance following prolonged priming by GLP-1R activation (5). Also, the glycemic control prior to GIPR/GLP-1R activation seems important, as the dual GIPR/GLP-1R agonist NNC0090-2746 was reported to induce the greatest reductions in body weight in patients with baseline hemoglobin A<sub>1c</sub> (HbA<sub>1c</sub>) <8.5% (<69 mmol/mol) (23).

In the current study, we evaluated the effects of a 5-h high-dose GIP infusion on energy intake (primary end point), energy expenditure, circulating concentrations of glucose, cholesterol, triglycerides, and glucose-regulating hormones as well as postprandial gastric emptying and gallbladder motility in patients with type 2 diabetes with HbA<sub>1c</sub> <8.5% (<69 mmol/mol) all in stable treatment with metformin and a long-acting GLP-1R agonist. We hypothesized that prolonged treatment with a long-acting GLP-1R agonist preceding GIP administration would prime the suggested beneficial effects of GIP, i.e., reductions in energy intake and plasma glucose.

## RESEARCH DESIGN AND METHODS

### Approvals and Registrations

The study was conducted at Center for Clinical Metabolic Research, Gentofte Hospital, in accordance with the Declaration of Helsinki. Oral and written consent was obtained from all participants before inclusion. The study was approved by the Scientific-Ethical Committee of the Capital Region of Denmark (identification no. H-16031728, amendment 660103 and 62994) and the Danish Data Protection Agency (journal no. BFH-2017-009) and registered at ClinicalTrials.gov (reg. no. NCT03526289).

### Study Participants

Eligible study participants were Caucasian men, age 18–70 years, with type 2 diabetes, HbA<sub>1c</sub> <8.5% (<69 mmol/mol), and BMI 25–40 kg/m<sup>2</sup>, treated for ≥3 months with stable doses of metformin and a long-acting GLP-1R agonist. Exclusion criteria included treatment with other glucose-lowering drugs, other medical treatments that could not be paused for a minimum of 12 h, tobacco smoking, allergy or intolerance to ingredients included in the standardized meals, anorexia, bulimia or binge eating disorder, liver disease, nephropathy or anemia, any current or prior gastrointestinal disease that could interfere with the end points variables, and any physical

or psychological condition that the investigator felt would interfere with trial participation.

### Experimental Procedures

Each participant underwent two experimental days: one day of GIP infusion and one day of placebo infusion. The two days were performed in a randomized order, blinded for the participant as well as the investigator, and with an interposed wash-out period of at least 72 h. For a standardized baseline balance of macronutrients, the participants were instructed to abstain from alcohol and strenuous physical exercise 48 h prior to each experimental day and to consume a standardized meal for dinner the evening before each experimental day between 6:00 and 8:00 P.M. (pasta Bolognese, 558 g, with energy content 753 kcal, 44% of energy [E%] from carbohydrates, 37 E% fat, and 16 E% protein). After the meal, the participants were instructed to fast overnight. To uniformize study conditions, we paused all oral agents (including metformin) in the fasting period, whereas the GLP-1R agonist treatment was continued as prescribed. On the experimental days, the participants were placed in a semirecumbent position resting in a hospital bed and cannulas were inserted in the cubital veins: one for infusion and one in the contralateral arm for blood sampling; the latter was wrapped in a heating pad for arterialization of the venous blood. At time point 0 min, infusion of either GIP (8 pmol/kg/min for 10 min followed by 6 pmol/kg/min) or placebo (isotonic sodium chloride) was started (Fig. 1A). At time point 60 min, the participants ingested a standardized liquid mixed meal (Nutricia Nutridrink, 200 mL [energy content 300 kcal, with 49 E% from carbohydrates, 35 E% fat, and 16 E% protein]; Nutricia) to which was added 1.5 g acetaminophen dissolved in 100 mL water for evaluation of gastric emptying. At time point 270 min, an ad libitum meal of pasta Bolognese (energy content per 100 g: 135 kcal, with 44 E% from carbohydrates, 37 E% fat, and 16 E% protein) was served together with 500 mL water. The ad libitum serving was weighed before and after meal ingestion, and energy intake was calculated from the weight difference. The participants were allowed 30 min to eat and drink and were instructed to stop when they felt comfortably full.

### Infusions

Synthetic human GIP (1-42) (~96% purity) was purchased from Bachem

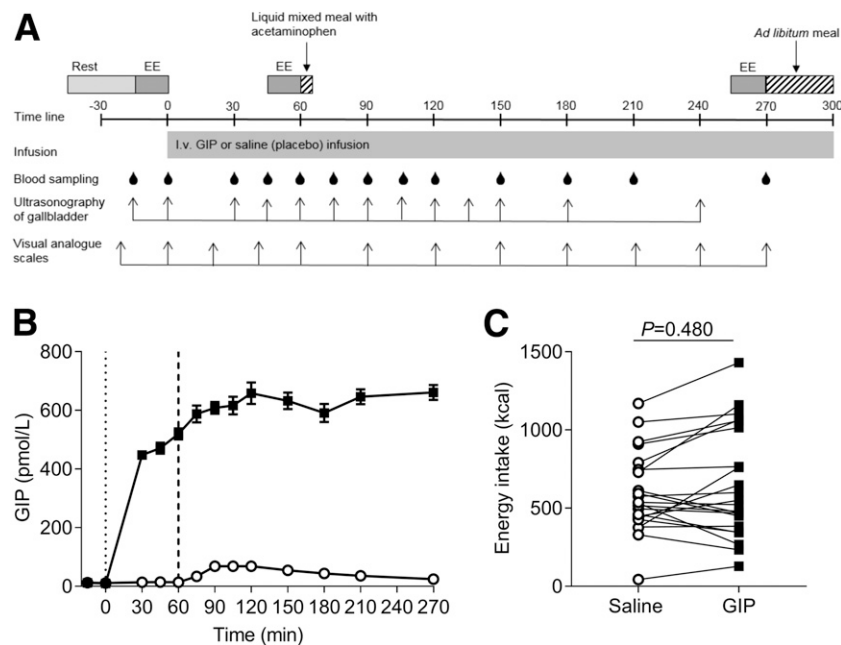

**Figure 1**—Overview over experimental setup during the two study days (A), plasma excursion of total GIP (B), and energy intake from the ad libitum meal served after 270 min of infusion (C). Data are means  $\pm$  SEM (N = 22). B and C: ■, infusion with GIP; ○, infusion with saline (placebo). Thin dotted line at time point 0 min indicates time for start of GIP infusion (8 pmol/kg/min from 0 to 10 min and 6 pmol/kg/min for the remainder of the experimental day). Bold dashed line indicates ingestion of the standardized liquid mixed meal. P value is from Student paired *t* test with adjustment for multiple testing using the Benjamini-Hochberg procedure. EE, energy expenditure.

(Bubendorf, Switzerland). The peptide was dissolved in sterilized water with 0.5% human serum albumin (CSL Behring, Lyngby, Denmark) at the pharmacy of the Capital Region of Denmark, Herlev, Denmark. The solution was dispensed into vials with sufficient peptide per vial for one study day; the vials were tested for endotoxins and sterility and stored at  $-20^{\circ}\text{C}$  until use. In the morning of the experimental days, a person not otherwise involved in the study thawed and diluted the peptide solution under sterile conditions in saline (isotone sodium chloride; B. Braun Medical Inc., Melsungen, Germany) with 0.5% human albumin (5% solution) (CSL Behring) to a total of 250 mL or prepared placebo infusate consisting of 250 mL saline with 0.5% human albumin.

#### Blood Samples and Analyses

Blood samples were drawn regularly throughout the study days. In total,  $\sim 250$  mL blood was drawn per participant per study day (see Fig. 1A). For glucose measurements, blood was sampled into fluoride tubes and centrifuged immediately at 7,400g for 45 s at room temperature and measured bedside by the glucose oxidase method (model 2900 STAT Plus analyzer; YSI, Yellow Springs, OH). For measurements of serum insulin

and C-peptide, blood was collected into tubes containing serum clot activator and was left to coagulate for at least 20 min at room temperature. For analyses of GIP, GLP-1, glucagon, free fatty acids, and glycerol blood were collected into chilled tubes containing EDTA and a specific dipeptidyl peptidase 4 inhibitor (valine-pyrrolidide [0.01 mmol/L final concentration], a gift from Novo Nordisk A/S, Måløv, Denmark) and placed on ice immediately after sampling. For measurements of triglycerides, cholesterol, and acetaminophen, blood was sampled into lithium-heparin tubes. All tubes were centrifuged for 20 min at  $\sim 2,900\text{g}$  and  $4^{\circ}\text{C}$ . Serum and plasma samples were stored at  $-80^{\circ}\text{C}$  and  $-20^{\circ}\text{C}$ , respectively, until batch analyses could be performed. Serum insulin and C-peptide were measured with a two-sided electrochemiluminescence immunoassay (ADVIA Centaur XP; Siemens Healthcare, Ballerup, Denmark). The plasma concentrations of total GIP, total GLP-1, and glucagon were analyzed by radioimmunoassays using the antibodies 80867, 89390, and 4305, respectively (27–29). Plasma concentrations of the GLP-1R agonists were measured using an assay for the N-terminus of the GLP-1 moiety of the agonists against

standards of liraglutide (30). Free fatty acids were measured with a NEFA C kit (Wako Chemicals, Neuss, Germany), and glycerol (Boehringer Mannheim, Germany) was measured by enzymatic methods modified to run on a COBAS 6000 automatic analyzer (Roche, Rødovre, Denmark). Plasma triglycerides, total cholesterol, HDL cholesterol, and acetaminophen were analyzed by spectrophotometric methods following hydrolysis and oxidation (Vitros 5.1 FS; Johnson & Johnson, Ortho-Clinical Diagnostics, Raritan, NJ).

#### Measurement of Gallbladder Volume

Gallbladder volume was assessed by ultrasound scans of the gallbladder using a Flex-Focus 500 ultrasound scanner (B&K Medical, Herlev, Denmark). For time points of measurements, see Fig. 1A. The measures were performed by the same investigator at all time points. The scans were performed with the participant in a supine position. Three dimensions of the gallbladder (one longitudinal and two cross-sectional diameters) were measured.

#### Measurements of Energy Expenditure and Respiratory Quotient

Energy expenditure and respiratory quotient were measured by indirect calorimetry using a tight facemask connected to a calorimeter, with measurement of gas exchange breath by breath (Med-Graphics CCM Express; Medical Graphics Corporation, St. Paul, MN). The calorimeter was calibrated immediately before each measurement, and the measurements were performed for 15 min each, starting at time point  $-15$  min (baseline measure) and then at 45 min (prior to ingestion of the liquid mixed meal) and 250 min (prior to serving of the ad libitum meal) (Fig. 1A).

#### Appetite and Palatability Ratings

The participants rated their level of hunger, satiety, fullness, prospective food consumption, comfort, nausea, and thirst on 100-mm visual analog scales (VAS) every 20 min from time point  $-20$  min to 60 min and every 30 min thereafter (Fig. 1A). Additionally, the participants rated the appearance, smell, taste, off-taste, and overall impression of the ad libitum meal on VAS scores right after the first bite of the ad libitum meal.

#### Statistical Analyses and Calculations

Results are presented as mean  $\pm$  SEM unless otherwise stated. Comparisons between the experimental days were

performed using Student paired *t* test. *P* values were corrected for multiple testing using the Benjamini-Hochberg procedure (31). Adjusted *P* values  $\leq 0.05$  were considered statistically significant. SAS, version 9.4 (SAS Institute, Cary, NC), and GraphPad Prism, version 8, for Windows (GraphPad Software, San Diego, CA) were used for statistical analyses. Sample size calculation using an estimated SD of 186 kcal, a two-sided  $\alpha$  level of 5%, and a power of 80% showed that 22 men should be included to detect a minimum difference in energy intake from the ad libitum meal of 20% estimated to correspond to 112 kcal. The SD was based on unpublished data from the Center for Clinical Metabolic Research, Gentofte Hospital, University of Copenhagen, of patients with type 2 diabetes who had been served an ad libitum meal in a similar experimental setting. It was predefined that in case of dropout, the missing participant should be replaced. Area under the curve (AUC) was calculated using the trapezoidal rule. Insulin secretion rate (ISR) was calculated using ISEC, a mathematical modeling based on deconvolution of C-peptide concentrations, age, height, weight, sex, and population-based variables for C-peptide kinetics (32). Insulin resistance was calculated using the HOMA based on fasting plasma glucose and serum C-peptide values (HOMA2-IR calculator: [www.dtu.ox.ac.uk/homacalculator](http://www.dtu.ox.ac.uk/homacalculator)). VLDL cholesterol was calculated as triglycerides  $\times 0.45$ . LDL cholesterol was calculated as total cholesterol  $- (\text{HDL cholesterol} + \text{triglycerides} \times 0.45)$ . Gallbladder volume was calculated as:  $(\text{longitudinal diameter}) \times (\text{cross-sectional diameter } 1) \times (\text{cross-sectional diameter } 2) \times \pi/6$  (33). Gallbladder ejection fraction to each time point (*t*) was calculated as change from fasting gallbladder volume (volume<sub>fasting</sub> assessed as the mean of the gallbladder volume at time points  $-15$  and  $0$  min) using the following formula:  $100\% \times (\text{volume}_{\text{fasting}} - \text{volume}_t) / \text{volume}_{\text{fasting}}$  (34).

## RESULTS

### Study Participants

Twenty-two participants completed the two study days and were included in the data analysis. For participant characteristics, see Table 1. Besides the obligatory metformin and GLP-1R agonist treatments, none of the participants were treated with glucose-lowering and/or body weight-lowering agents.

**Table 1—Participant characteristics**

|                                      | <i>n</i> | Mean $\pm$ SEM  | Range       |
|--------------------------------------|----------|-----------------|-------------|
| Men/women                            | 22/0     |                 |             |
| Age (years)                          |          | 61 $\pm$ 2      | 34–70       |
| BMI (kg/m <sup>2</sup> )             |          | 31.5 $\pm$ 0.7  | 25.3–37.4   |
| Body weight (kg)                     |          | 103.5 $\pm$ 3.0 | 81.6–129.5  |
| Waist-to-hip ratio                   |          | 1.04 $\pm$ 0.01 | 0.98–1.17   |
| Duration of diabetes (years)         |          | 9.5 $\pm$ 1.2   | 2–21        |
| HbA <sub>1c</sub> (mmol/mol)         |          | 51 $\pm$ 1.5    | 36–61       |
| HbA <sub>1c</sub> (%)                |          | 6.8 $\pm$ 0.1   | 5.4–7.7     |
| Fasting plasma glucose (mmol/L)      |          | 7.8 $\pm$ 0.2   | 5.7–9.8     |
| HOMA2-IR                             |          | 2.1 $\pm$ 0.1   | 1.1–3.0     |
| HOMA2-B (%)                          |          | 64.2 $\pm$ 5.4  | 31.1–111.2  |
| Metformin (dose, mg/day)             | 22       | 1,773 $\pm$ 113 | 1,000–3,000 |
| Liraglutide (dose, mg/day)           | 21       | 1.5 $\pm$ 0.1   | 1.2–1.8     |
| Dulaglutide (dose, mg/week)          | 1        | 1.5 $\pm$ 0     |             |
| Cholesterol-lowering drugs (statins) | 18 (18)  |                 |             |

HOMA2-IR, HOMA2-calculated insulin resistance; HOMA2-B, HOMA2-calculated  $\beta$ -cell function.

### Plasma Concentrations of GLP-1 and GIP

At baseline, plasma concentrations of GIP were similar on the two study days ( $P = 0.676$ ) (Table 2 and Fig. 1B). After start of the GIP infusion, the plasma concentration of total GIP rose, and steady state was reached after  $\sim 45$  min at  $\sim 600$  pmol/L (Table 2 and Fig. 1B). During placebo infusion, after ingestion of the liquid mixed meal, plasma GIP rose to a peak concentration of  $88 \pm 7$  pmol/L at time point  $117 \pm 7$  min. All participants adhered to their respective treatment with the long-acting GLP-1R agonist as evaluated by the baseline plasma concentration of the N-terminally modified end of GLP-1 (Table 2). The endogenous secretion of GLP-1 was evaluated by measurements of total GLP-1 (i.e., amidated GLP-1 and therefore showing no cross-reaction with the nonamidated agonists), and measurements were similar between the two interventions ( $\text{AUC}_{0-270 \text{ min}}$ ,  $P = 0.914$ ) (Table 2).

### Plasma Acetaminophen

No differences were observed in plasma acetaminophen concentrations between the two interventions ( $\text{AUC}_{60-270 \text{ min}}$ ,  $P = 0.384$ ) (Table 2 and Fig. 2A).

### Plasma Glucose

Baseline plasma glucose did not differ between the two study days ( $P = 0.553$ ) (Table 2 and Fig. 2B). In the first fasting hour, plasma glucose was reduced more during placebo infusion than during GIP infusion, resulting in different plasma glucose concentrations prior to ingestion of

the standardized liquid mixed meal ( $P = 0.009$ ) (Table 2 and Fig. 2B). After ingestion of the liquid mixed meal, plasma glucose rose to statistically similar peak values during GIP and placebo infusion ( $P = 0.374$ ) and thereafter declined toward fasting concentrations (Fig. 2B). AUC was higher during GIP compared with placebo infusion in both the fasting period ( $\text{AUC}_{0-60 \text{ min}}$ ) and the postprandial period ( $\text{AUC}_{60-270 \text{ min}}$ ) and during the full study day ( $\text{AUC}_{0-270 \text{ min}}$ ) (Table 2).

### Serum Insulin and C-Peptide, ISR, and Plasma Glucagon

There were no differences in baseline concentrations of insulin, C-peptide, ISR, or glucagon on the two study days (Table 2). During the first fasting hour, serum insulin and C-peptide rose during GIP infusion, whereas a small decrease was observed for both parameters during placebo infusion (Table 2 and Fig. 2C and D). This resulted in higher fasting AUCs for insulin and C-peptide during GIP compared with saline infusion ( $P < 0.001$  for  $\text{AUC}_{0-60 \text{ min}}$  for both insulin and C-peptide) and higher insulin and C-peptide concentrations at the time of initiation of the liquid mixed meal (Table 2). After ingestion of the liquid mixed meal, insulin and C-peptide rose and peaked at similar concentrations during the two interventions (Table 2 and Fig. 2C and D). AUC for the postprandial period ( $\text{AUC}_{60-270 \text{ min}}$ ) as well as AUC for the full study day ( $\text{AUC}_{0-270 \text{ min}}$ ) was similar between the interventions (Table 2). Also, the maximal ISRs were similar between the interventions (Table 2 and Fig. 2E).

**Table 2—Difference in plasma and serum substrate and hormonal concentrations, energy expenditure, and respiratory quotient during GIP and saline infusions**

|                                                              | GIP infusion | Saline infusion | Raw <i>P</i> | Adjusted <i>P</i> | 95% CI         |
|--------------------------------------------------------------|--------------|-----------------|--------------|-------------------|----------------|
| Baseline plasma concentration of the GLP-1R agonist (nmol/L) | 14.3 ± 1.4   | 14.1 ± 1.5      | 0.829        | 0.914             | −1.2 to 1.0    |
| Plasma total GIP                                             |              |                 |              |                   |                |
| Baseline (pmol/L)                                            | 11 ± 1       | 12 ± 1          | 0.352        | 0.676             | −3.5 to 1.3    |
| Steady state (pmol/L) (mean of time point 45–270 min)        | 599 ± 19     | NA              | NA           | NA                | NA             |
| Peak (pmol/L)                                                | 747 ± 34     | 88 ± 7          | <0.0001      | <0.0001           | 586–731        |
| Time to peak (min)                                           | 200 ± 48     | 117 ± 7         | 0.093        | 0.376             | −15 to 180     |
| AUC <sub>0–270 min</sub> (nmol/L × min)                      | 153 ± 5      | 10 ± 1          | <0.0001      | <0.0001           | 132–153        |
| Plasma total GLP-1                                           |              |                 |              |                   |                |
| Baseline (pmol/L)                                            | 23 ± 1.1     | 22 ± 0.8        | 0.247        | 0.553             | −1.0 to 3.6    |
| Peak (pmol/L)                                                | 38 ± 1.6     | 41 ± 2.6        | 0.246        | 0.553             | −8.1 to 2.2    |
| Time to peak (min)                                           | 141 ± 9      | 126 ± 9         | 0.222        | 0.553             | −10 to 40      |
| AUC <sub>0–270 min</sub> (pmol/L × min)                      | 7,834 ± 288  | 7,781 ± 243     | 0.810        | 0.914             | −392 to 496    |
| Plasma acetaminophen                                         |              |                 |              |                   |                |
| Baseline (μmol/L)                                            | 2.6 ± 0.3    | 2.7 ± 0.4       | 0.839        | 0.914             | −0.5 to 0.4    |
| Peak (μmol/L)                                                | 77.0 ± 4.5   | 80.3 ± 3.8      | 0.206        | 0.531             | −8.6 to 2.0    |
| Time to peak (min)                                           | 165 ± 8      | 151 ± 6         | 0.074        | 0.374             | −2 to 30       |
| AUC <sub>60–270 min</sub> (mmol/L × min)                     | 10.7 ± 0.6   | 11.2 ± 0.4      | 0.107        | 0.384             | −1.1 to 0.1    |
| Plasma glucose                                               |              |                 |              |                   |                |
| Baseline (mmol/L)                                            | 7.9 ± 0.3    | 7.7 ± 0.2       | 0.232        | 0.553             | −0.1 to 0.3    |
| Time point 60 min (mmol/L)                                   | 7.6 ± 0.2    | 7.0 ± 0.2       | 0.001        | 0.009             | 0.3–0.8        |
| Peak (mmol/L)                                                | 10.8 ± 0.4   | 10.4 ± 0.3      | 0.088        | 0.374             | −0.1 to 0.8    |
| Time to peak (min)                                           | 155 ± 6      | 142 ± 5         | 0.098        | 0.379             | −2.6 to 28.5   |
| AUC <sub>0–60 min</sub> (mmol/L × min)                       | 460 ± 13     | 439 ± 12        | 0.005        | 0.030             | 7–35           |
| AUC <sub>60–270 min</sub> (mmol/L × min)                     | 1,818 ± 60   | 1,713 ± 49      | 0.004        | 0.026             | 38–171         |
| AUC <sub>0–270 min</sub> (mmol/L × min)                      | 2,394 ± 74   | 2,260 ± 62      | 0.002        | 0.017             | 57–211         |
| Serum insulin                                                |              |                 |              |                   |                |
| Baseline (pmol/L)                                            | 114 ± 14     | 117 ± 15        | 0.628        | 0.859             | −13 to 8       |
| Time point 60 min (pmol/L)                                   | 138 ± 19     | 96 ± 12         | 0.0001       | 0.007             | 20–63          |
| Peak (pmol/L)                                                | 324 ± 52     | 357 ± 46        | 0.267        | 0.582             | −94 to 27      |
| Time to peak (min)                                           | 156 ± 10     | 143 ± 5         | 0.175        | 0.480             | −6 to 32       |
| AUC <sub>0–60 min</sub> (nmol/L × min)                       | 8.2 ± 1.1    | 6.3 ± 0.8       | <0.0001      | 0.0007            | 1.2 to 2.7     |
| AUC <sub>60–270 min</sub> (nmol/L × min)                     | 47.8 ± 7.3   | 48.6 ± 6.3      | 0.819        | 0.914             | −7.7 to 6.2    |
| AUC <sub>0–270 min</sub> (nmol/L × min)                      | 56.0 ± 8.3   | 54.9 ± 7.1      | 0.747        | 0.914             | −6.2 to 8.5    |
| Serum C-peptide                                              |              |                 |              |                   |                |
| Baseline (pmol/L)                                            | 888 ± 55     | 876 ± 53        | 0.653        | 0.859             | −44 to 69      |
| Time point 60 min (pmol/L)                                   | 1,083 ± 81   | 843 ± 56        | <0.0001      | 0.0001            | 158–322        |
| Peak (pmol/L)                                                | 1,946 ± 178  | 1,875 ± 138     | 0.462        | 0.743             | −126 to 267    |
| Time to peak (min)                                           | 201 ± 8      | 184 ± 7         | 0.110        | 0.384             | −4 to 37       |
| AUC <sub>0–60 min</sub> (nmol/L × min)                       | 61.3 ± 4.1   | 51.1 ± 3.3      | <0.0001      | 0.0001            | 6.7–13.8       |
| AUC <sub>60–270 min</sub> (nmol/L × min)                     | 329 ± 29     | 310 ± 22        | 0.201        | 0.531             | −10.8 to 48.1  |
| AUC <sub>0–270 min</sub> (nmol/L × min)                      | 390 ± 32     | 361 ± 25        | 0.076        | 0.374             | −3.2 to 61.1   |
| ISR                                                          |              |                 |              |                   |                |
| Baseline (pmol/min/kg)                                       | 2.3 ± 0.1    | 2.3 ± 0.1       | 0.853        | 0.918             | −0.2 to 0.2    |
| Peak (pmol/min/kg)                                           | 5.8 ± 0.5    | 5.5 ± 0.4       | 0.341        | 0.674             | −0.4 to 1.1    |
| Time to peak (min)                                           | 166 ± 14     | 166 ± 6         | 0.949        | 0.977             | −30 to 28      |
| Plasma glucagon                                              |              |                 |              |                   |                |
| Baseline (pmol/L)                                            | 12 ± 1       | 12 ± 1          | 0.904        | 0.961             | −2 to 1        |
| Time point 60 min (pmol/L)                                   | 16 ± 2       | 11 ± 1          | 0.0005       | 0.006             | 2–6            |
| AUC <sub>0–60 min</sub> (pmol/L × min)                       | 1,060 ± 97   | 706 ± 69        | <0.0001      | 0.0007            | 230–478        |
| AUC <sub>60–270 min</sub> (pmol/L × min)                     | 3,297 ± 338  | 2,950 ± 311     | 0.047        | 0.266             | 5.4–690        |
| AUC <sub>0–270 min</sub> (pmol/L × min)                      | 4,357 ± 430  | 3,655 ± 377     | 0.004        | 0.026             | 252–1,151      |
| Energy expenditure                                           |              |                 |              |                   |                |
| Baseline, time: −15 to 0 min (kcal/24 h)                     | 1,790 ± 41   | 1,747 ± 42      | 0.382        | 0.705             | −57 to 142     |
| Prior to mixed meal, time: 45–60 min (kcal/24 h)             | 1,751 ± 52   | 1,785 ± 35      | 0.435        | 0.743             | −120 to 60     |
| Prior to ad libitum meal, time: 250–265 min (kcal/24 h)      | 1,799 ± 54   | 1,777 ± 52      | 0.734        | 0.914             | −110 to 151    |
| Respiratory quotient                                         |              |                 |              |                   |                |
| Baseline, time: −15 to 0 min                                 | 0.83 ± 0.01  | 0.84 ± 0.02     | 0.481        | 0.757             | −0.03 to 0.02  |
| Prior to mixed meal, time: 45–60 min                         | 0.80 ± 0.01  | 0.81 ± 0.01     | 0.448        | 0.743             | −0.03 to 0.01  |
| Prior to ad libitum meal, time: 250–265 min                  | 0.82 ± 0.01  | 0.86 ± 0.01     | 0.003        | 0.023             | −0.07 to −0.02 |

Data are presented as mean ± SEM (*N* = 22) unless otherwise indicated. Raw *P* values and 95% CIs are from Student paired *t* tests comparing the days of GIP and saline (placebo) infusion, respectively. Adjusted *P* values are corrected for multiple testing using the Benjamini-Hochberg procedure.



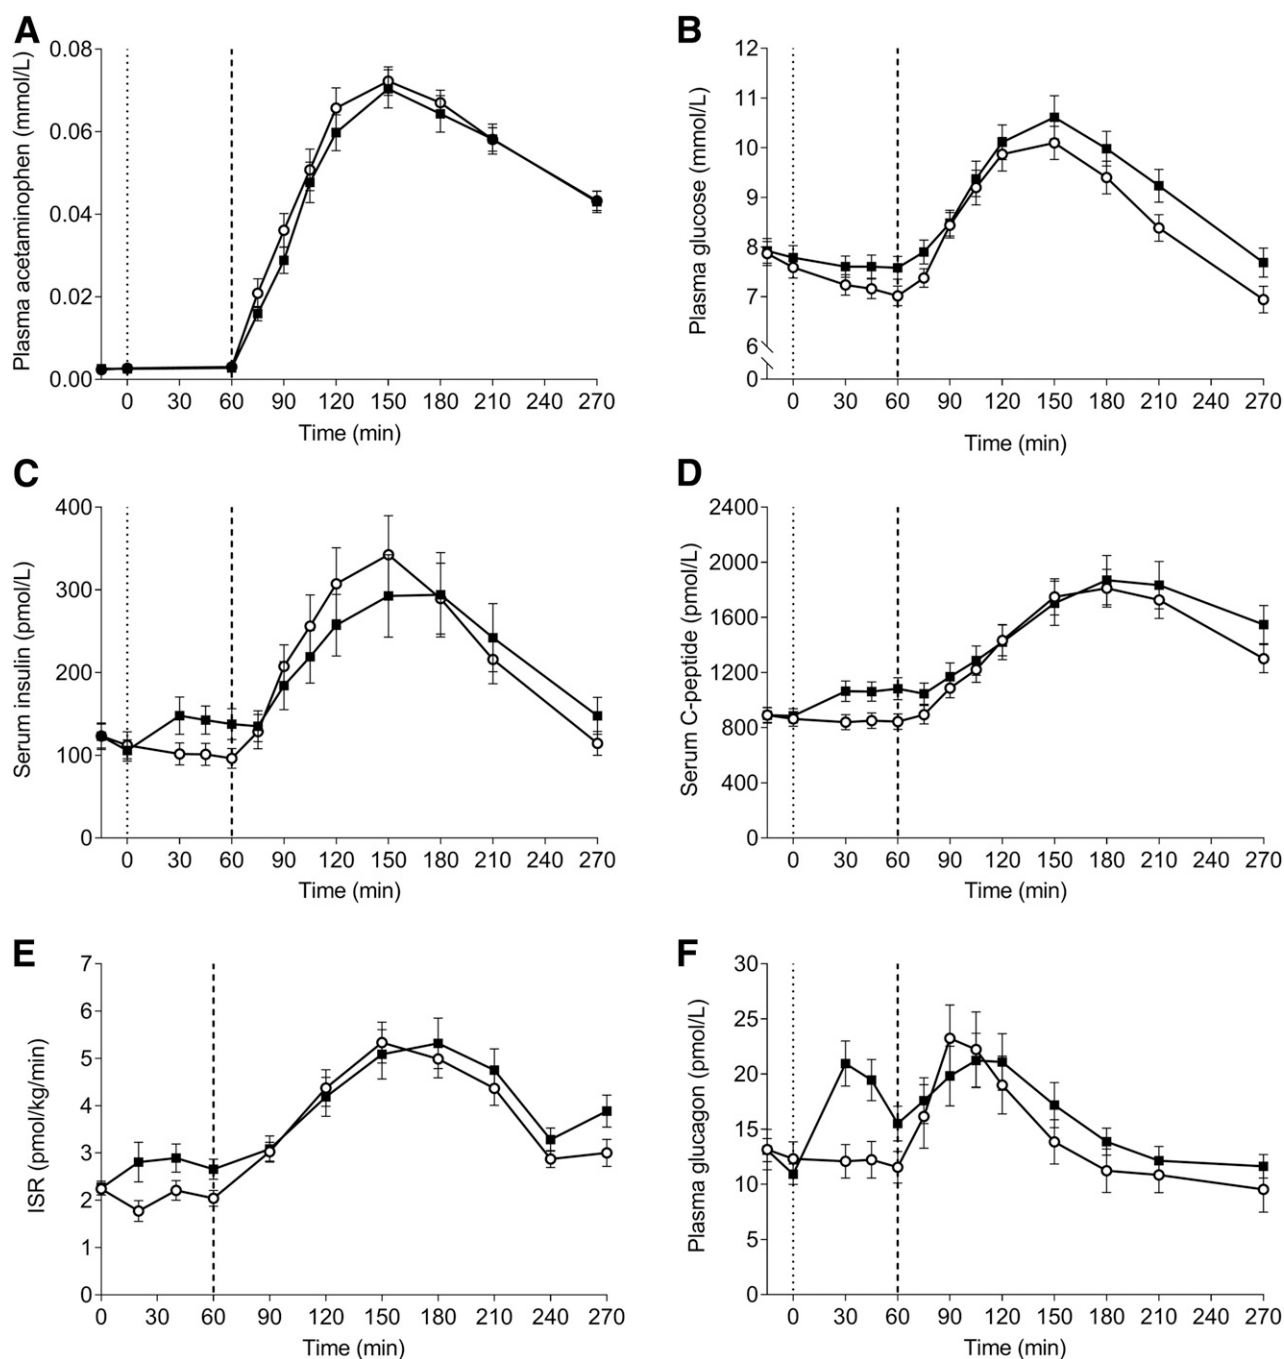

**Figure 2**—Data are means  $\pm$  SEM ( $N = 22$ ). Plasma acetaminophen (A), plasma glucose (B), serum insulin (C), serum C-peptide (D), ISR (E), and plasma glucagon (F) during infusion with GIP (■) and saline (placebo) (○). Thin dotted line at time point 0 min indicates time for start of GIP infusion (8 pmol/kg/min from 0 to 10 min and 6 pmol/kg/min for the remainder of the experimental day). Bold dashed line indicates ingestion of the standardized liquid mixed meal.

For plasma glucagon, a pronounced increase was observed right after initiation of the GIP infusion, whereas during placebo infusion, fasting plasma glucagon remained stable at the baseline concentration (Table 2 and Fig. 2F). This resulted in significantly higher  $AUC_{0-60 \text{ min}}$  for glucagon during GIP infusion compared with saline infusion ( $P < 0.001$ ) (Table 2). After ingestion of the liquid mixed meal, plasma glucagon rose during both interventions,

resulting in similar postprandial AUCs ( $AUC_{60-270 \text{ min}}$ ) ( $P = 0.266$ ), while AUC for the full experimental day ( $AUC_{0-270 \text{ min}}$ ) was higher during GIP infusion compared with saline infusion ( $P = 0.026$ ) (Table 2).

#### Plasma Cholesterols, Triglycerides, Free Fatty Acids, and Glycerol

Baseline concentrations as well as  $AUC_{0-270 \text{ min}}$  of total cholesterol, HDL cholesterol, LDL cholesterol, VLDL cholesterol,

triglycerides, free fatty acids, and glycerol were similar between the two interventions (Supplementary Table 1 and Supplementary Fig. 1A–G).

#### Gallbladder Volume and Ejection Fraction

Baseline gallbladder volumes were similar on the two study days. After ingestion of the liquid mixed meal, gallbladder emptying showed no significant differences

between the interventions (Supplementary Fig. 2A). Also, the ejection fractions were similar between the interventions (Supplementary Table 2 and Supplementary Fig. 2B).

### Energy Expenditure and Respiratory Quotient

Energy expenditure did not differ between the interventions whether measured at baseline, at time point 45–60 min (just prior to ingestion of the mixed meal), or at time point 250–265 min (just prior to serving of the ad libitum meal) (Table 2). The respiratory quotient did not differ between GIP and placebo infusion at baseline or prior to the mixed meal, but at the 250–265 min measure, respiratory quotient was lower during GIP infusion than during placebo infusion ( $P = 0.023$ ) (Table 2).

### Appetite Ratings

Hunger, satiety, fullness, prospective food consumption, and thirst were statistically similar between the interventions (Supplementary Fig. 3A–E). Also, comfort and nausea were similar during GIP and placebo infusions with high ratings of comfort (mean  $\pm$  SEM comfort score  $8.8 \pm 0.3$  and  $8.8 \pm 0.3$ ,  $P = 0.987$ , respectively, with 10 equaling “very comfortable”) and low ratings of nausea (mean nausea score  $0.3 \pm 0.2$  and  $0.2 \pm 0.1$ ,  $P = 0.705$ , respectively, with 0 equaling “no nausea”) (Supplementary Fig. 3F and G).

### Energy Intake and Palatability

Energy intake from the ad libitum meal (primary end point of the study) was similar during GIP and placebo infusion, respectively ( $648 \pm 74$  vs.  $594 \pm 55$  kcal,  $P = 0.171$ , adjusted  $P = 0.480$ , mean difference 53 kcal, 95% CI  $-25$  to  $132$ ) (Fig. 1C) (one participant had a small energy intake on both study days; post hoc analyses of the data without the data from this participant did not change the results [data not shown]). Water intake also did not differ during GIP and placebo infusion ( $414 \pm 24$  vs.  $375 \pm 31$  mL,  $P = 0.236$ , adjusted  $P = 0.553$ , mean difference 39 mL, 95% CI  $-27$  to  $104$ ). The overall impression of the ad libitum meal as well as the look, scent, and taste of the meal was at or above average (mean scores  $\geq 5$  on a scale from 1 to 10), with no difference between the scores obtained during GIP and placebo infusions (data not shown).

## CONCLUSIONS

We report that a 5-h high-dose GIP infusion in patients with type 2 diabetes on stable treatment with metformin and a long-acting GLP-1R agonist did not influence energy intake, appetite, or energy expenditure but lowered the respiratory quotient and increased plasma concentrations of glucagon and glucose compared with placebo.

The applied GIP dose resulted in clearly supraphysiological plasma concentrations of total GIP. Accordingly, the lack of effect on energy intake and energy expenditure does not seem to be caused by insufficient dosing of GIP, though we cannot exclude an effect of different GIP-to-GLP-1 dose ratios.

The participants had an HbA<sub>1c</sub> between 5.4 and 7.7% ( $36$ – $61$  mmol/mol) with a mean HbA<sub>1c</sub> of  $6.8 \pm 0.1\%$  ( $51 \pm 1.5$  mmol/mol). Hence, they were well regulated. This might be important, as the effect of GIP on insulin secretion is severely diminished in patients with type 2 diabetes with poor glycemic control but seems to be somewhat restored during near normoglycemia (9). Similarly, poor metabolic control could diminish other GIP functions, as suggested by a study demonstrating that the effect of exogenous GIP on subcutaneous adipose tissue blood flow is impaired in obese compared with lean individuals but seems to be somewhat restored following weight loss (35,36).

Opposite to the glucose-lowering effects observed from dual GIPR/GLP-1R agonists (21–23), we observed higher plasma glucose levels during GIP infusion compared with placebo infusion—a difference seemingly driven by a pronounced glucagonotropic effect of GIP. These findings are in line with previous studies in patients with type 2 diabetes reporting increased glucagon concentrations (37,38) and worsened postprandial plasma glucose excursions during GIP infusion (37). Also, our findings are in line with a study reporting that GIP antagonizes the glucagonostatic effect of GLP-1 when GIP and GLP-1 are infused concomitantly to patients with type 2 diabetes (16). A study in critically ill patients has also shown that GIP infusion to GLP-1 infusion increases glucagon concentrations in the fasting state; however, no effects on plasma glucose or insulin were observed in that study (39). In the current study, we observed slightly higher fasting insulin and C-peptide

concentrations during GIP compared with placebo infusion. Whether this is due to a direct insulinotropic effect of GIP or caused by the pronounced increase in plasma glucagon and ensuing elevation in fasting plasma glucose concentration cannot be inferred from this study. Interestingly, the dual GIPR/GLP-1R agonist tirzepatide has been shown to reduce glucagon more than the GLP-1R agonist dulaglutide (21). Though the long-term effect of GIP on glucagon concentrations remains unexplored in humans, the current study shows that during prolonged GLP-1R activation, acute administration of GIP stimulates glucagon secretion. This finding does not lend support to the notion that the GIPR-activating component of dual GIPR/GLP-1R agonists is important for their glucose-lowering effect in humans.

We here report that GIP infusion did not affect energy expenditure (as also previously reported in patients with type 2 diabetes [19]) but lowered the respiratory quotient compared with placebo—the latter seemingly caused by a lack of rise in respiratory quotient following the liquid mixed meal during GIP infusion compared with placebo infusion. The higher plasma glucose concentration and unchanged free fatty acid concentration observed during GIP infusion would be expected to increase the respiratory quotient. Hence, the lower respiratory quotient during GIP infusion compared with placebo could indicate that GIP induces a shift toward fat oxidation in humans. Preclinical studies have reported that the dual GIPR/GLP-1R agonist tirzepatide mainly reduces body weight through a reduction in energy intake, resulting in more fat oxidation, but also seems to increase energy expenditure with a slower onset (40). Whether the present finding of acute GIP-induced lowering of the respiratory quotient with no effect on energy expenditure will be sustained during longer-term GIPR activation and/or translate into clinically relevant effects on body weight remains unknown.

GLP-1R activation has been suggested to prime the beneficial metabolic effects of GIPR activation by yet unknown mechanisms (5,13). Thus, initial priming by GLP-1 could facilitate the complementary benefits reported from dual GIPR/GLP-1R activation. Hence, all participants in the current study were in stable treatment for  $\geq 3$  months with a long-acting GLP-1R agonist and the treatment was

continued during the study. Data from mice have suggested that administration of GLP-1 results in an initial weight loss, whereas GIP administration results in a delayed body weight loss (13). In this perspective, the acute study design of the current study would be considered a limitation. We found a nonsignificant mean increase in energy intake of 53 kcal during GIP compared with saline infusion (95% CI –25 to 132 kcal, raw  $P = 0.171$ , adjusted  $P = 0.480$ ). Based on these findings, we cannot exclude that a clinically relevant increase in energy intake might have been overlooked due to a lack of power. Nevertheless, based on the present results, long-term GLP-1R activation does not seem to prime any relevant acute energy intake-lowering effects of GIP. We recently reported that whereas GIP infusion did not affect energy intake, short-term infusion of GIP and GLP-1 during isoglycemic conditions resulted in higher caloric intake from an ad libitum meal compared with GLP-1 administration alone in overweight/obese men without diabetes (20). This discrepancy could be due to different study conditions and populations (20). Furthermore, the slightly higher plasma glucose levels at the time of the ad libitum meal during GIP infusion ( $<1$  mmol/L) in the current study may have influenced the results.

In conclusion, we here show that a 5-h infusion of GIP (resulting in clearly supra-physiological plasma concentrations) administered to well-regulated patients with type 2 diabetes treated with metformin and long-acting GLP-1R agonists did not lower energy intake or significantly influence appetite, energy expenditure, gastric emptying, gallbladder motility, or plasma lipids but lowered the respiratory quotient, increased plasma glucagon and fasting serum insulin and C-peptide concentrations, and increased plasma glucose compared with placebo. These findings do not indicate acute metabolic benefits of GIP administration on top of stable GLP-1R agonism in men with type 2 diabetes.

**Acknowledgments.** The authors are grateful for the commitment from the study participants. The authors thank Sisse Marie Schmidt and Inass Al Nachar, both from Clinical Metabolic Physiology, Steno Diabetes Center Copenhagen, for laboratory assistance, and Medicolect, Copenhagen, Denmark, for help with patient recruitment. **Funding.** The study was supported by unrestricted grants from the Innovation Fund Denmark (to

N.C.B.), the A.P. Møller Foundation, the Aase and Ejnar Danielsen Foundation, and the Danish Medical Research Grant.

**Duality of Interest.** During the study, N.C.B. was employed as a PhD student at Zealand Pharma A/S in collaboration with the Capital Region of Denmark. L.S.G. and M.B.C. are minority shareholders in Antag Therapeutics. J.J.H. has served on advisory panels of, as a consultant for, and/or received research support from AstraZeneca, GlaxoSmithKline, Hamni, Intarcia, Merck Sharp & Dohme (MSD)/Merck, Novo Nordisk, and Zealand Pharma and is a minority shareholder, cofounder, and board member of Antag Therapeutics. L.J. was employed at Zealand Pharma A/S at the time of manuscript preparation. T.V. has received lecture fees from, participated in advisory boards of, consulted for, and/or received research grants from Amgen, AstraZeneca, Boehringer Ingelheim, Eli Lilly, MSD/Merck, Novo Nordisk, Sanofi, and Sun Pharma. A.L. has received lecture fees from Novo Nordisk and AstraZeneca. F.K.K. has received lecture fees from, participated in advisory boards of, consulted for, and/or received research grants from Amgen, AstraZeneca, Boehringer Ingelheim, Carmot Therapeutics, Eli Lilly, MSD/Merck, Novo Nordisk, Sanofi, and Zealand Pharma and is a minority shareholder in Antag Therapeutics. No other potential conflicts of interest relevant to this article were reported.

**Author Contributions.** N.C.B. was involved in planning of the study, conduct of the clinical experiments, statistical analyses, and writing of the manuscript. L.S.G. was involved in planning of the study, statistical analyses, and writing of the manuscript. S.M.H. and L.S.L.K. were involved in conduct of the clinical experiments. B.H. and J.J.H. analyzed plasma samples for GIP, GLP-1, and glucagon. F.D. analyzed plasma samples for free fatty acids and glycerol. L.J., M.B.C., T.V., and A.L. were involved in planning of the study. F.K.K. conceptualized the study and was involved in planning of the study, the statistical analyses, and writing of the manuscript. All authors critically reviewed the manuscript and approved the version to be published. N.C.B. and F.K.K. are the guarantors of this work and, as such, had full access to all the data in the study and take responsibility for the integrity of the data and the accuracy of the data analysis.

**Prior Presentation.** Parts of this study were presented at the European Association for the Study of Diabetes Incretin Study Group Meeting, Bochum, Germany, 24–26 January 2019.

## References

- Gasbjerg LS, Helsted MM, Hartmann B, et al. Separate and combined glucometabolic effects of endogenous glucose-dependent insulinotropic polypeptide and glucagon-like peptide 1 in healthy individuals. *Diabetes* 2019;68:906–917
- Nauck MA, Bartels E, Orskov C, Ebert R, Creutzfeldt W. Additive insulinotropic effects of exogenous synthetic human gastric inhibitory polypeptide and glucagon-like peptide-1 (7–36) amide infused at near-physiological insulinotropic hormone and glucose concentrations. *J Clin Endocrinol Metab* 1993;76:912–917
- Nauck MA, Homberger E, Siegel EG, et al. Incretin effects of increasing glucose loads in man calculated from venous insulin and C-peptide

responses. *J Clin Endocrinol Metab* 1986;63:492–498

- Flint A, Raben A, Astrup A, Holst JJ. Glucagon-like peptide 1 promotes satiety and suppresses energy intake in humans. *J Clin Invest* 1998;101:515–520
- Finan B, Müller TD, Clemmensen C, Perez-Tilve D, DiMarchi RD, Tschöp MH. Reappraisal of GIP pharmacology for metabolic diseases. *Trends Mol Med* 2016;22:359–376
- Nauck MA, Heimesaat MM, Orskov C, Holst JJ, Ebert R, Creutzfeldt W. Preserved incretin activity of glucagon-like peptide 1 [7–36 amide] but not of synthetic human gastric inhibitory polypeptide in patients with type-2 diabetes mellitus. *J Clin Invest* 1993;91:301–307
- Vilsvøll T, Krarup T, Madsbad S, Holst JJ. Defective amplification of the late phase insulin response to glucose by GIP in obese Type II diabetic patients. *Diabetologia* 2002;45:1111–1119
- Knop FK, Vilsvøll T, Højberg PV, et al. The insulinotropic effect of GIP is impaired in patients with chronic pancreatitis and secondary diabetes mellitus as compared to patients with chronic pancreatitis and normal glucose tolerance. *Regul Pept* 2007;144:123–130
- Højberg PV, Vilsvøll T, Rabøl R, et al. Four weeks of near-normalisation of blood glucose improves the insulin response to glucagon-like peptide-1 and glucose-dependent insulinotropic polypeptide in patients with type 2 diabetes. *Diabetologia* 2009;52:199–207
- Aaboe K, Akram S, Deacon CF, Holst JJ, Madsbad S, Krarup T. Restoration of the insulinotropic effect of glucose-dependent insulinotropic polypeptide contributes to the antidiabetic effect of dipeptidyl peptidase-4 inhibitors. *Diabetes Obes Metab* 2015;17:74–81
- Miyawaki K, Yamada Y, Ban N, et al. Inhibition of gastric inhibitory polypeptide signaling prevents obesity. *Nat Med* 2002;8:738–742
- Kim SJ, Nian C, Karunakaran S, Clee SM, Isales CM, McIntosh CHS. GIP-overexpressing mice demonstrate reduced diet-induced obesity and steatosis, and improved glucose homeostasis. *PLoS One* 2012;7:e40156
- Mroz PA, Finan B, Gelfanov V, et al. Optimized GIP analogs promote body weight lowering in mice through GIPR agonism not antagonism. *Mol Metab* 2019;20:51–62
- Fulurija A, Lutz TA, Sladko K, et al. Vaccination against GIP for the treatment of obesity. *PLoS One* 2008;3:e3163
- Boylan MO, Glazebrook PA, Tatalovic M, Wolfe MM. Gastric inhibitory polypeptide immunoneutralization attenuates development of obesity in mice. *Am J Physiol Endocrinol Metab* 2015;309:E1008–E1018
- Mentis N, Vardarli I, Köthe LD, et al. GIP does not potentiate the antidiabetic effects of GLP-1 in hyperglycemic patients with type 2 diabetes. *Diabetes* 2011;60:1270–1276
- Elahi D, McAloon-Dyke M, Fukagawa NK, et al. The insulinotropic actions of glucose-dependent insulinotropic polypeptide (GIP) and glucagon-like peptide-1 (7–37) in normal and diabetic subjects. *Regul Pept* 1994;51:63–74
- Lund A, Vilsvøll T, Bagge JI, Holst JJ, Knop FK. The separate and combined impact of the intestinal hormones, GIP, GLP-1, and GLP-2, on glucagon secretion in type 2 diabetes. *Am J Physiol Endocrinol Metab* 2011;300:E1038–E1046



19. Daousi C, Wilding JPH, Aditya S, et al. Effects of peripheral administration of synthetic human glucose-dependent insulinotropic peptide (GIP) on energy expenditure and subjective appetite sensations in healthy normal weight subjects and obese patients with type 2 diabetes. *Clin Endocrinol (Oxf)* 2009;71:195–201
20. Bergmann NC, Lund A, Gasbjerg LS, et al. Effects of combined GIP and GLP-1 infusion on energy intake, appetite and energy expenditure in overweight/obese individuals: a randomised, crossover study. *Diabetologia* 2019;62:665–675
21. Frias JP, Nauck MA, Van J, et al. Efficacy and safety of LY3298176, a novel dual GIP and GLP-1 receptor agonist, in patients with type 2 diabetes: a randomised, placebo-controlled and active comparator-controlled phase 2 trial. *Lancet* 2018;392:2180–2193
22. Finan B, Ma T, Ottaway N, et al. Unimolecular dual incretins maximize metabolic benefits in rodents, monkeys, and humans. *Sci Transl Med* 2013;5:209ra151
23. Frias JP, Bastyr EJ III, Vignati L, et al. The sustained effects of a dual GIP/GLP-1 receptor agonist, NNC0090-2746, in patients with type 2 diabetes. *Cell Metab* 2017;26:343–352.e2
24. Nørregaard PK, Deryabina MA, Tofteng Shelton P, et al. A novel GIP analogue, ZP4165, enhances glucagon-like peptide-1-induced body weight loss and improves glycaemic control in rodents. *Diabetes Obes Metab* 2018;20:60–68
25. Gault VA, Kerr BD, Harriott P, Flatt PR. Administration of an acylated GLP-1 and GIP preparation provides added beneficial glucose-lowering and insulinotropic actions over single incretins in mice with Type 2 diabetes and obesity. *Clin Sci (Lond)* 2011;121:107–117
26. DiMarchi RD. “Let’s Stay Together”; GIP and GLP-1 dual agonism in the treatment of metabolic disease. *Mol Metab* 2018;18:1–2
27. Ørskov C, Rabenhøj L, Wettergren A, Kofod H, Holst JJ. Tissue and plasma concentrations of amidated and glycine-extended glucagon-like peptide I in humans. *Diabetes* 1994;43:535–539
28. Lindgren O, Carr RD, Deacon CF, et al. Incretin hormone and insulin responses to oral versus intravenous lipid administration in humans. *J Clin Endocrinol Metab* 2011;96:2519–2524
29. Lund A, Bagger JJ, Wewer Albrechtsen NJ, et al. Evidence of extrapancreatic glucagon secretion in man. *Diabetes* 2016;65:585–597
30. Christensen M, Sparre-Ulrich AH, Hartmann B, et al. Transfer of liraglutide from blood to cerebrospinal fluid is minimal in patients with type 2 diabetes. *Int J Obes* 2015;39:1651–1654
31. Benjamini Y, Hochberg Y. Controlling the false discovery rate: a practical and powerful approach to multiple testing. *J R Stat Soc B* 1995;57:289–300
32. Hovorka R, Soons PA, Young MA. ISEC: a program to calculate insulin secretion. *Comput Methods Programs Biomed* 1996;50:253–264
33. Dodds WJ, Groh WJ, Darweesh RMA, Lawson TL, Kishk SM, Kern MK. Sonographic measurement of gallbladder volume. *AJR Am J Roentgenol* 1985;145:1009–1011
34. Nexøe-Larsen CC, Sørensen PH, Hausner H, et al. Effects of liraglutide on gallbladder emptying: a randomized, placebo-controlled trial in adults with overweight or obesity. *Diabetes Obes Metab* 2018;20:2557–2564
35. Asmar M, Simonsen L, Arnglim N, Holst JJ, Dela F, Bülow J. Glucose-dependent insulinotropic polypeptide has impaired effect on abdominal, subcutaneous adipose tissue metabolism in obese subjects. *Int J Obes* 2014;38:259–265
36. Asmar M, Arnglim N, Simonsen L, et al. The blunted effect of glucose-dependent insulinotropic polypeptide in subcutaneous abdominal adipose tissue in obese subjects is partly reversed by weight loss. *Nutr Diabetes* 2016;6:e208
37. Chia CW, Carlson OD, Kim W, et al. Exogenous glucose-dependent insulinotropic polypeptide worsens post prandial hyperglycemia in type 2 diabetes. *Diabetes* 2009;58:1342–1349
38. Christensen MB, Calanna S, Holst JJ, Vilsbøll T, Knop FK. Glucose-dependent insulinotropic polypeptide: blood glucose stabilizing effects in patients with type 2 diabetes. *J Clin Endocrinol Metab* 2014;99:E418–E426
39. Lee MY, Fraser JD, Chapman MJ, et al. The effect of exogenous glucose-dependent insulinotropic polypeptide in combination with glucagon-like peptide-1 on glycemia in the critically ill. *Diabetes Care* 2013;36:3333–3336
40. Coskun T, Sloop KW, Loghin C, et al. LY3298176, a novel dual GIP and GLP-1 receptor agonist for the treatment of type 2 diabetes mellitus: from discovery to clinical proof of concept. *Mol Metab* 2018;18:3–14
